# Supplementary material
Source: PubMed Central journal article supplement (PMC4394749)
Supplement: NIHMS677778-supplement-Supporting_Info.pdf [file NIHMS677778-supplement-Supporting_Info.pdf]

## Supporting Information

### Development of a novel class of tubulin inhibitor from desmosdumotin B with a hydroxylated bicyclic B-ring

Kyoko Nakagawa-Goto<sup>†,‡,\*</sup>, Akifumi Oda<sup>†</sup>, Ernest Hamel<sup>§</sup>, Emika Ohkoshi<sup>‡</sup>, Kuo-Hsiung Lee<sup>‡,△,⊥</sup>, Masuo Goto<sup>‡,\*</sup>

<sup>†</sup> *School of Pharmaceutical Sciences, College of Medical, Pharmaceutical and Health Sciences, Kanazawa University, Kanazawa, 920-1192, Japan*

<sup>‡</sup> *Natural Product Research Laboratories, Chemical Biology and Medicinal Chemistry, UNC Eshelman School of Pharmacy, University of North Carolina, Chapel Hill, North Carolina 27599-7568, United States*

<sup>△</sup> *UNC Lineberger Comprehensive Cancer Center, University of North Carolina, Chapel Hill, North Carolina, 27599-7295, United States*

<sup>§</sup> *Screening Technologies Branch, Developmental Therapeutics Program, Division of Cancer Treatment and Diagnosis, Frederick National Laboratory for Cancer Research, National Cancer Institute, Frederick, Maryland, 21702, United States*

<sup>⊥</sup> *Chinese Medicine Research and Development Center, China Medical University and Hospital, 2 Yuh-Der Road, Taichung, 40447, Taiwan*

\*Corresponding authors. K.N.G. Tel.: +81-76-264-6305, e-mail: [kngoto@p.kanazawa-u.ac.jp](mailto:kngoto@p.kanazawa-u.ac.jp)

M.G. Tel.: +1-919-843-6325, fax: 919-966-3893, e-mail: [goto@med.unc.edu](mailto:goto@med.unc.edu)

## Table of Contents

|   |                                                                          |       |
|---|--------------------------------------------------------------------------|-------|
| 1 | Synthetic Procedure of Benzo[ <i>b</i> ]thiophene Aldehydes              | S3-4  |
| 2 | Table S1, cLogP and PSA Parameter of TEDB-TBs                            | S5    |
| 3 | Table S2, Standard Deviations for Table 1                                | S6    |
| 4 | Figure S1, Immunofluorescence Staining of PC-3 Cells                     | S7    |
| 5 | Figure S2, Immunofluorescence Staining of PC-3 Cells                     | S8-12 |
| 6 | Figure S3, Binding Modes of Colchicine in a Tubulin Crystal<br>Structure | S13   |
| 7 | Figure S4, 3D Models of <b>12</b> and DAMA-colchicine                    | S14   |
| 8 | References for Supporting Information                                    | S15   |

## 1. Synthetic Procedure for Benzo[*b*]thiophene Aldehydes

**5-Methoxy-3-methylbenzo[*b*]thiophene (35)**<sup>1,2</sup>: To a solution of 4-methoxybenzenethiol (**32**, 5.4 g, 38.9 mmol) in DMF (30 mL) was added K<sub>2</sub>CO<sub>3</sub> (11.0 g, 79.7 mmol) and chloroacetone (3.4 mL, 42.7 mmol) at 0 °C. The mixture was stirred for 0.5 h at 0 °C, then allowed to warm to rt and stirred for 3 h. The reaction mixture was diluted with AcOEt and washed with water. The organic phase was washed with brine, dried over Na<sub>2</sub>SO<sub>4</sub> and concentrated *in vacuo*. The residue was heated with polyphosphoric acid (22 g) in toluene (60 mL) at 100 °C for 18 h. The mixture was concentrated, carefully neutralized with K<sub>2</sub>CO<sub>3</sub> at 0 °C and extracted with AcOEt. The organic phase was washed with brine, dried over Na<sub>2</sub>SO<sub>4</sub>, and concentrated *in vacuo*. The residue was chromatographed on silica gel with AcOEt–hexane as eluent to afford the target compound **35** (3.827 g) in 55% yield. <sup>1</sup>H NMR (300 MHz, CDCl<sub>3</sub>, δ): 7.70 (d, 1H, *J* = 8.6 Hz, 7-*H*), 7.14 (d, 1H, *J* = 2.6 Hz, 4-*H*), 7.08 (br s, 1H, 2-*H*), 7.00 (dd, 1H, *J* = 8.6 and 2.6 Hz, 6-*H*), 3.90 (s, 3H, 5-OCH<sub>3</sub>), 2.40 (d, 3H, *J* = 1.2 Hz, 3-CH<sub>3</sub>).

**4- and 6-Methoxy-3-methylbenzo[*b*]thiophene (36<sup>3</sup> and 37<sup>4</sup>)**: To a solution of 3-methoxybenzenethiol (**33**, 6.0 mL, 48.9 mmol) in DMF (30 mL) was added K<sub>2</sub>CO<sub>3</sub> (14.3 g, 103.7 mmol) and chloroacetone (4.3 mL, 54 mmol) at 0 °C. The mixture was stirred for 4 h allowed to warm to rt without heating. After the same work-up as described above, the residue was heated with polyphosphoric acid (35.3 g) in toluene (50 mL) at 100 °C for 18 h. Work-up was performed as described above. The residue was chromatographed on silica gel with AcOEt–hexane as eluent to afford **36** (1.728 g) as a colorless solid in 20% yield and **37** (3.634 g) as a colorless oil in 50% yield. **36**: <sup>1</sup>H NMR (300 MHz, CDCl<sub>3</sub>, δ): 7.39 (d, 1H, *J* = 8.0 Hz, 7-*H*), 7.22 (dd, 1H, *J* = 8.0 and 7.8 Hz, 6-*H*), 6.86 (s, 1H, 2-*H*), 6.71 (d, 1H, *J* = 7.8 Hz, 5-*H*), 3.90 (s, 3H, 4-OCH<sub>3</sub>), 2.61 (s, 3H, 3-CH<sub>3</sub>). **37**: <sup>1</sup>H NMR (300 MHz, CDCl<sub>3</sub>, δ): 7.58 (d, 1H, *J* = 8.8 Hz, 4-*H*), 7.32 (d, 1H, *J* = 7.8 Hz, 7-*H*), 7.01 (dd, 1H, *J* = 8.8 and 2.3 Hz, 5-*H*), 6.88 (d, 1H, *J* = 1.2 Hz, 2-*H*), 3.87 (s, 3H, 6-OCH<sub>3</sub>), 2.40 (d, 3H, *J* = 1.2 Hz 3-CH<sub>3</sub>).

**7-Methoxy-3-methylbenzo[*b*]thiophene (38<sup>5</sup>)**: To a solution of 3-methoxybenzenethiol (**34**, 2.0 g, 14.4 mmol) in DMF (10 mL) was added K<sub>2</sub>CO<sub>3</sub> (4.2 g, 30.4 mmol) and chloroacetone (1.3 mL, 16.3 mmol) at 0 °C. The mixture was stirred for 3 h while warming to rt without heating. After the same work-up as described above, the residue was heated with polyphosphoric acid

(15.5 g) in toluene (25 mL) at 100 °C for 21 h. Further work-up was as described above. The residue was chromatographed on silica gel with AcOEt–hexane as eluent to afford **38** (1.400 g) as a colorless solid in 55% yield. **38**: <sup>1</sup>H NMR (300 MHz, CDCl<sub>3</sub>, δ): 7.38–7.32 (m, 2H), 7.06 (br s, 1H), 6.82–6.76 (m, 1H), 4.00 (s, 3H, OCH<sub>3</sub>), 2.43 (s, 3H, CH<sub>3</sub>).

**General synthetic procedures for 24–27:** To a solution of methoxy-3-methylbenzo[*b*]thiophene (**35**, 1.244 g, 7.0 mmol) in CCl<sub>4</sub> (80 mL) was added *N*-bromosuccinimide (1.532 g, 8.6 mmol) and benzoyl peroxide (17 mg, 0.07 mmol). The reaction mixture was refluxed for 1.5 h. After filtration, the volatile solvent was removed *in vacuo*. The residue was dissolved in CHCl<sub>3</sub> (25 mL). Hexamethyltetramine (1.505 g, 10.8 mmol) was added, and the mixture was refluxed overnight. The volatile solvent was removed *in vacuo*, and 50% AcOH aq. (40 mL) was added to the residue. The mixture was refluxed for 3 h. After addition of water (20 mL) and CHCl<sub>3</sub> (4.0 mL), the mixture was refluxed for an additional 10 min, then allowed to stand for 3 h at rt. The mixture was diluted with water, and extracted with AcOEt. The organic phase was washed with brine, dried over Na<sub>2</sub>SO<sub>4</sub>, and concentrated *in vacuo*. The residue was chromatographed on silica gel with AcOEt–hexane as eluent to afford the target compound (**24**, 0.521 g) in 39% yield.

**5-Methoxybenzo[*b*]thiophene-3-carbaldehydes (24)**<sup>6,7</sup>: <sup>1</sup>H NMR (300 MHz, CDCl<sub>3</sub>, δ): 10.11 (s, 1H, -CHO), 8.31 (s, 1H, 2-*H*), 8.18 (d, 1H, *J* = 2.5 Hz, 4-*H*), 7.72 (d, 1H, *J* = 9.0 Hz, 7-*H*), 7.10 (dd, 1H, *J* = 9.0 and 2.2 Hz, 6-*H*), 3.92 (s, 3H, -OCH<sub>3</sub>).

**4-Methoxybenzo[*b*]thiophene-3-carbaldehydes (25)**<sup>3,7</sup>: 25% yield. <sup>1</sup>H NMR (300 MHz, CDCl<sub>3</sub>, δ): 10.65 (s, 1H, -CHO), 8.36 (s, 1H, 2-*H*), 7.50 (d, 1H, *J* = 8.0 Hz, 5- or 7-*H*), 7.37 (t, 1H, *J* = 8.0 Hz, 6-*H*), 6.92 (d, 1H, *J* = 8.0 Hz, 5- or 7-*H*), 4.03 (s, 3H, -OCH<sub>3</sub>).

**6-Methoxybenzo[*b*]thiophene-3-carbaldehydes (26)**<sup>7</sup>: 21% yield. <sup>1</sup>H NMR (300 MHz, CDCl<sub>3</sub>, δ): 10.08 (s, 1H, -CHO), 8.55 (d, 1H, *J* = 9.0 Hz, 4-*H*), 8.15 (s, 1H, 2-*H*), 7.33 (d, 1H, *J* = 2.3 Hz, 7-*H*), 7.13 (dd, 1H, *J* = 9.0 and 2.3 Hz, 5-*H*), 3.90 (s, 3H, -OCH<sub>3</sub>).

**7-Methoxybenzo[*b*]thiophene-3-carbaldehydes (27)**: 13% yield. <sup>1</sup>H NMR (300 MHz, CDCl<sub>3</sub>, δ): 10.15 (s, 1H, -CHO), 8.31 (s, 1H, 2-*H*), 8.24 (dd, 1H, *J* = 8.0 and 0.8 Hz, 4-*H*), 7.47 (t, 1H, *J* = 8.0 Hz, 5-*H*), 6.89 (d, 1H, *J* = 8.0 Hz, 5-*H*), 4.02 (s, 3H, -OCH<sub>3</sub>).

## 2. Table S1.

**cLogP and PSA Parameters of TEDB-TBs**

|            | Ring-B                                    | cLogP | PSA*  |
|------------|-------------------------------------------|-------|-------|
| <b>4</b>   | Benzo[ <i>b</i> ]thiophen-3'-yl           | 5.267 | 63.6  |
| <b>6-9</b> | Hydroxyl benzo[ <i>b</i> ]thiophen-3'-yl  | 4.759 | 83.83 |
| <b>13</b>  | Benzo[ <i>b</i> ]thiophene-2'-yl          | 5.477 | 63.6  |
| <b>14</b>  | Hydroxyl benzo[ <i>b</i> ]thiophene-2'-yl | 4.749 | 83.83 |
| <b>5</b>   | Naphthalen-1'-yl                          | 5.396 | 63.6  |
| <b>15</b>  | 4'-Hydroxyl naphthalen-1'-yl              | 4.835 | 83.83 |
| <b>16</b>  | 2'-Hydroxyl naphthalen-1'-yl              | 4.535 | 83.83 |
| <b>18</b>  | Naphthalen-2'-yl                          | 5.396 | 63.6  |
| <b>19</b>  | 6'-Hydroxyl naphthalen-2'-yl              | 4.729 | 83.83 |

Calculated by ChemBioDraw 13 software

PSA: polar surface area

### 3. Table S2.

**Standard Deviations for Table 1**

|           | Cell line/IC <sub>50</sub> (μM)            |        |      |      |                 |       |            |         |       |         | Inhibitory effects        |         |
|-----------|--------------------------------------------|--------|------|------|-----------------|-------|------------|---------|-------|---------|---------------------------|---------|
|           | KB                                         | KB-VIN | PC-3 | A549 | Hep-G2          | HCT-8 | MDA-MB-231 | SK-BR-3 | MCF-7 | ZR-75-1 | ITA EC <sub>50</sub> (μM) | ICB (%) |
| <b>4</b>  | 0.01                                       | 0.01   | 0.01 | 0.01 | 0.01            | 0.01  | 0.08       | 0.02    | 0.03  | 0.04    | 0.1                       | 5       |
| <b>6</b>  | 0.10                                       | 0.07   | 0.80 | 0.10 | 0.11            | 0.15  | 0.09       | 0.02    | 0.04  | 0.62    | 0.2                       | 2       |
| <b>7</b>  | 0.73                                       | 0.19   | 0.94 | 0.35 | 1.30            | 0.27  | 0.11       | 0.12    | 0.01  | 0.22    | 0.2                       | 0.8     |
| <b>8</b>  | 1.13                                       | 0.33   | 0.33 | 0.14 | 0.53            | 0.91  | 0.23       | 0.33    | 0.01  | 0.23    | 0.5                       | 2       |
| <b>9</b>  | 0.46                                       | 0.07   | 0.20 | 0.34 | 0.64            | 1.42  | NT         | NT      | NT    | NT      | 0.6                       | 5       |
| <b>10</b> | NA                                         | 0.52   | NA   | NA   | NT <sup>f</sup> | NT    | NT         | NT      | NT    | NT      | NT                        | NT      |
| <b>11</b> | NA                                         | NA     | NA   | NA   | NT              | NT    | NT         | NA      | NT    | NT      | NT                        | NT      |
| <b>12</b> | 0.11                                       | 1.61   | 1.93 | 0.99 | NT              | NT    | 0.44       | 0.72    | 0.12  | 0.09    | NT                        | NT      |
| <b>13</b> | 0.51                                       | 0.76   | 0.25 | 1.02 | 0.51            | 1.27  | NT         | NT      | NT    | NT      | NT                        | NT      |
| <b>14</b> | 1.24                                       | 0.44   | 2.17 | 0.53 | NT              | NT    | NT         | 2.10    | NT    | NT      | NT                        | NT      |
| <b>5</b>  | -                                          | -      | -    | -    | -               | -     | NT         | NT      | -     | NT      | 0.08                      | 10      |
| <b>15</b> | 0.08                                       | 0.13   | 3.7  | 0.06 | 0.26            | 0.15  | NT         | 0.10    | NT    | NT      | 0.3                       | 5       |
| <b>16</b> | NT                                         | NT     | NT   | NT   | NT              | NT    | NT         | NT      | NT    | NT      | 0.4                       | 3       |
| <b>17</b> | 0.10                                       | 0.07   | 0.07 | 0.05 | 0.05            | 0.22  | NT         | 0.96    | 0.14  | NT      | 0.3                       | 3       |
| <b>18</b> | 0.05                                       | 0.08   | 0.10 | 0.10 | 0.03            | 0.05  | NT         | NT      | 0.05  | NT      | NO                        | 0.4     |
| <b>19</b> | 1.26                                       | 0.78   | 1.89 | 0.99 | 1.58            | 1.55  | NT         | 0.81    | NT    | NT      | NT                        | NT      |
| <b>20</b> | NA                                         | NA     | NA   | NA   | NA              | NA    | NT         | NA      | NT    | NT      | NT                        | NT      |
|           | Combretastatin A-4 (CA): Tubulin inhibitor |        |      |      |                 |       |            |         |       |         | 1.1                       | 0.06    |

#### 4. Figure S1.

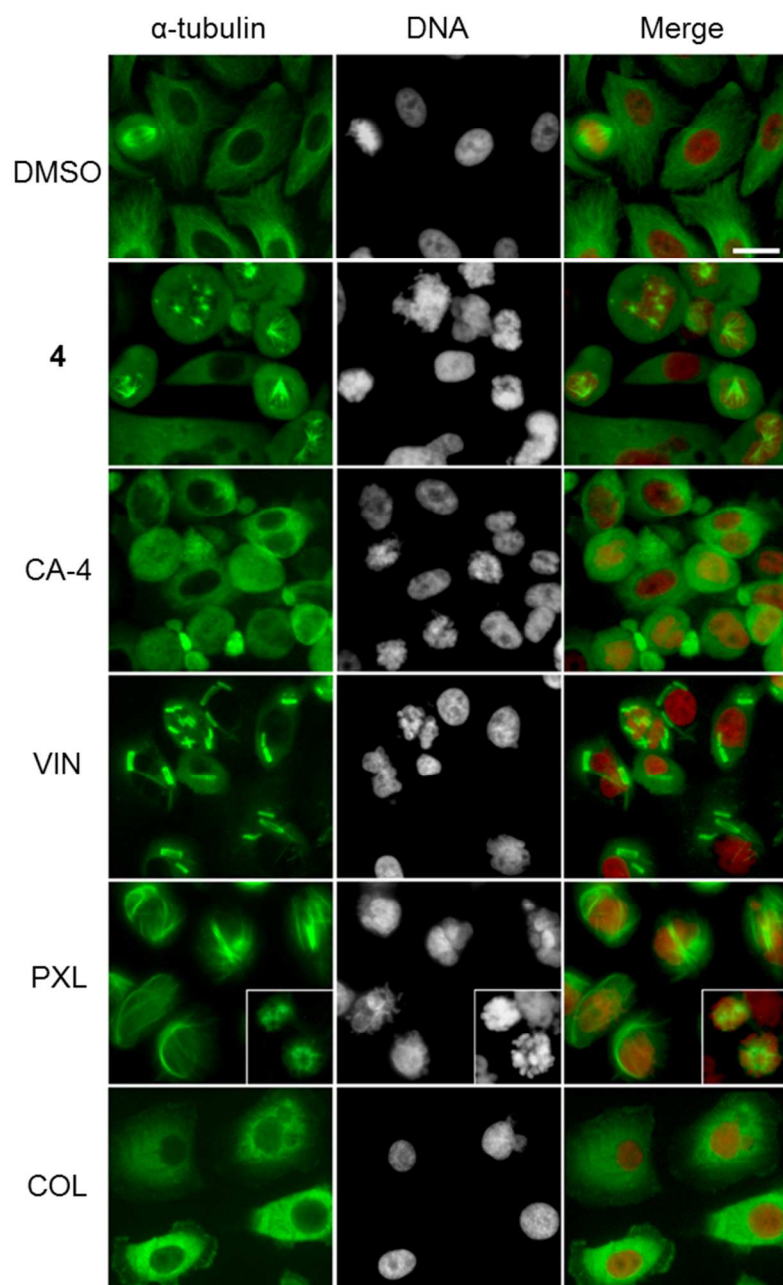

**Figure S1. Effects of compounds on microtubule morphology in PC-3 cells.** PC-3 cells were cultured and treated for 24 h with DMSO (control), 0.2  $\mu$ M compound 4 (TEDB-TB), 0.2  $\mu$ M CA-4 as a colchicine-like tubulin polymerization inhibitor, 5  $\mu$ M VIN, 0.2  $\mu$ M PXL as a microtubule hyper-stabilization agent, or 1  $\mu$ M colchicine (COL). Cells were stained with monoclonal antibody to  $\alpha$ -tubulin (green) and DAPI for DNA (white). Images were captured with an Olympus BX61 fluorescence microscope with CCD camera. Merged images were prepared using Adobe Photoshop. DNA was pseudo-colored in red the merged images. Bar, 25  $\mu$ m.

5. Figure S2.

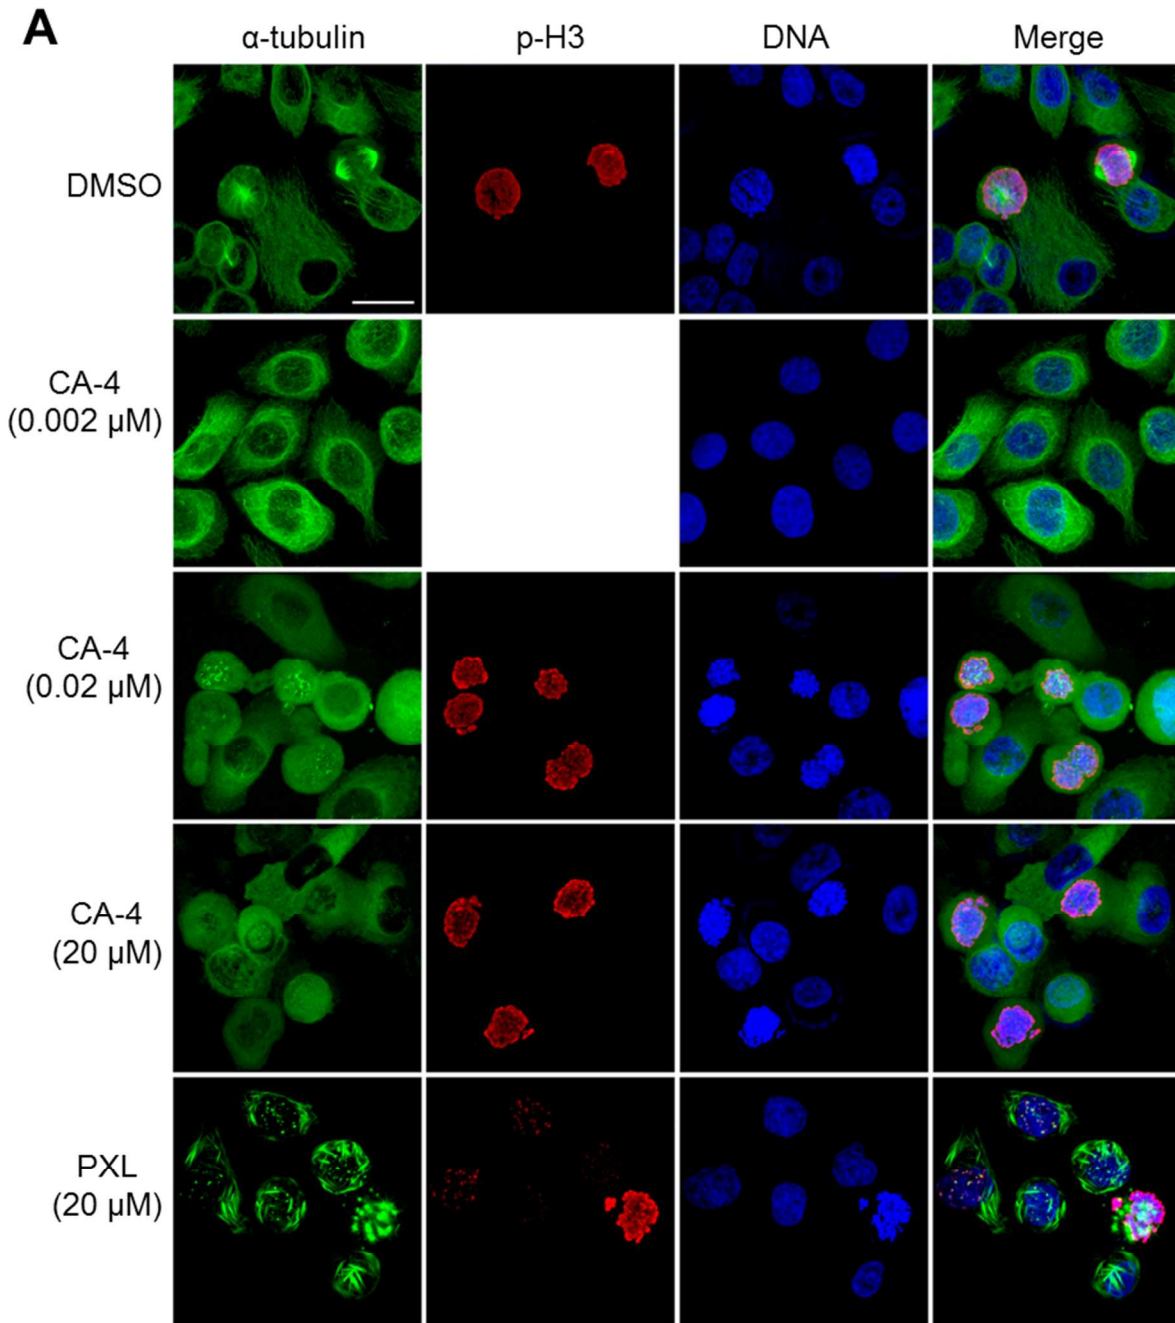



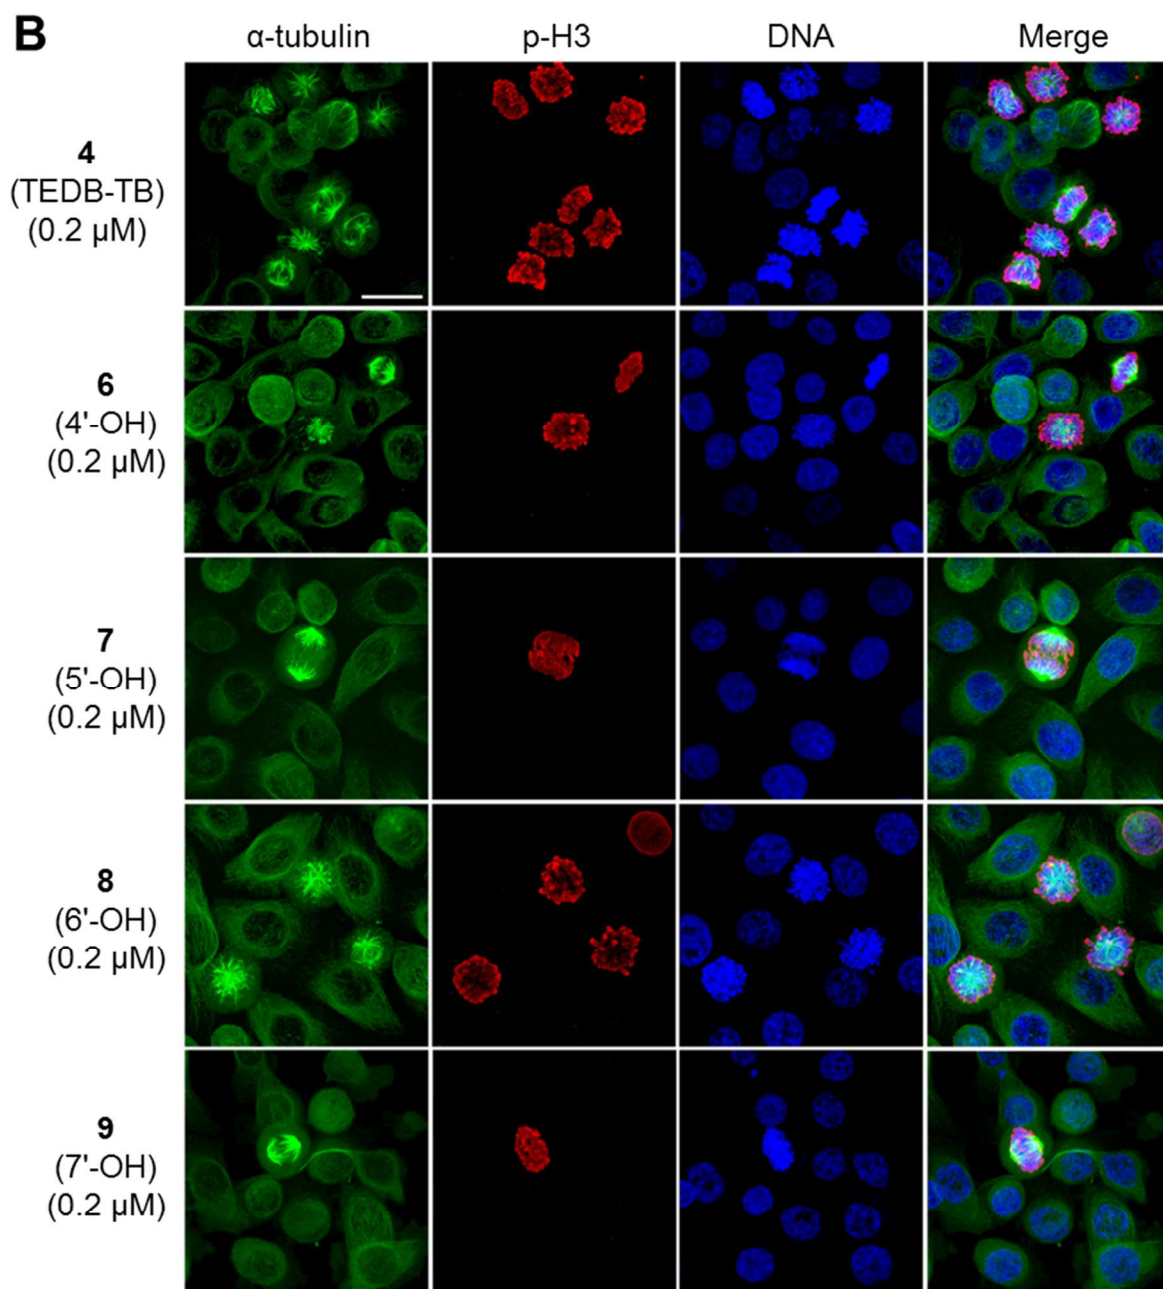

**C**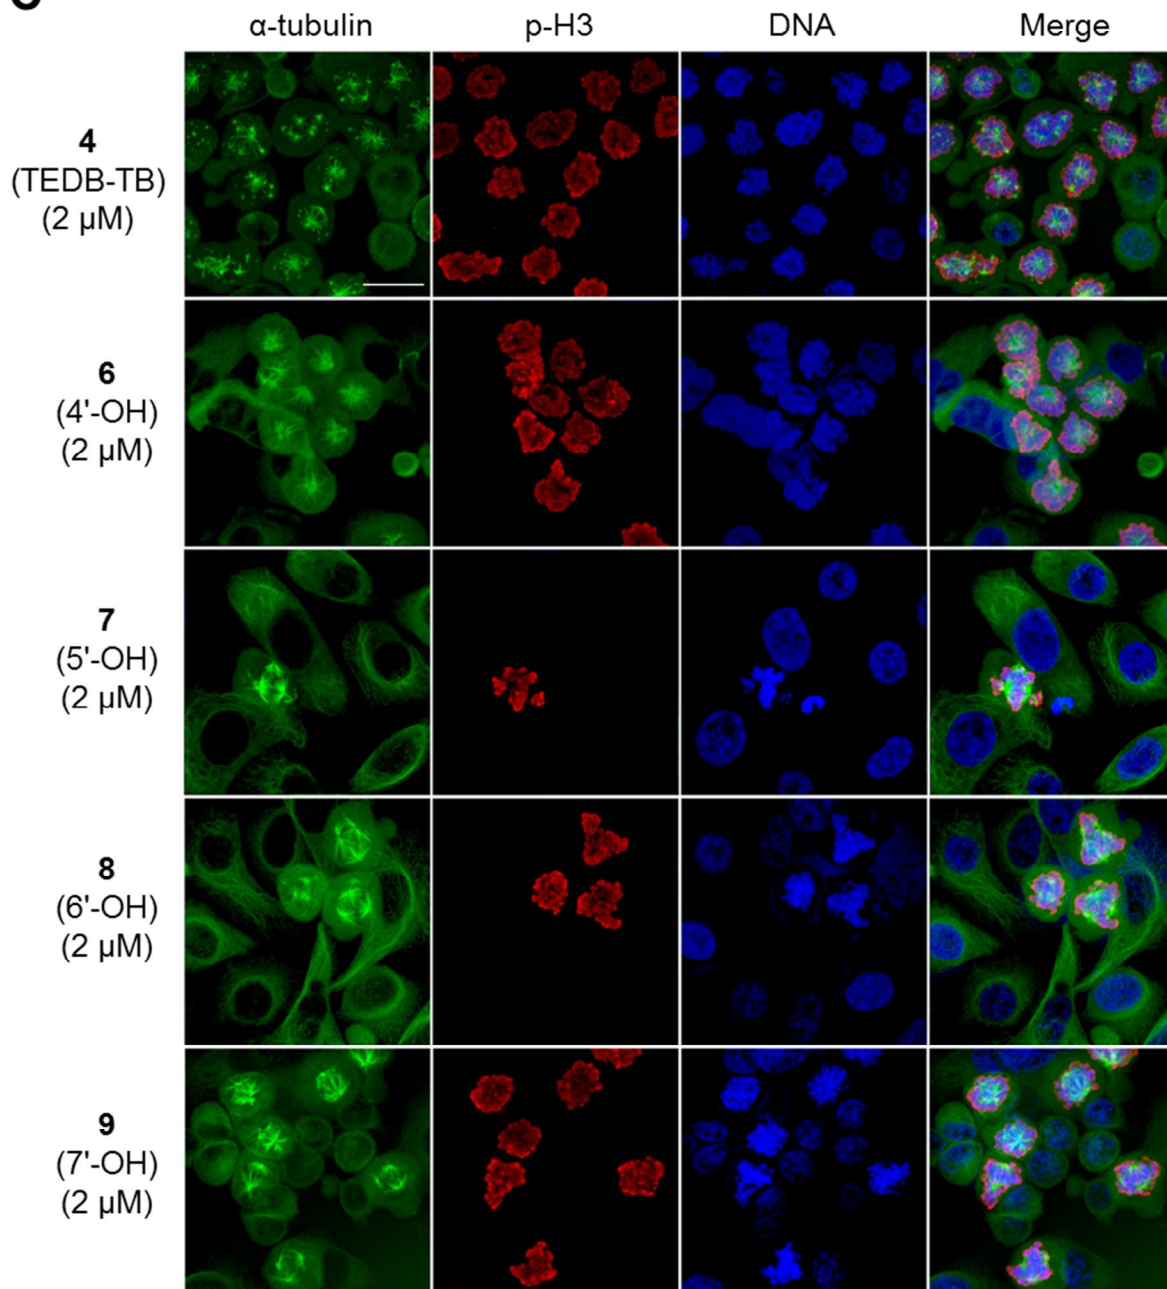

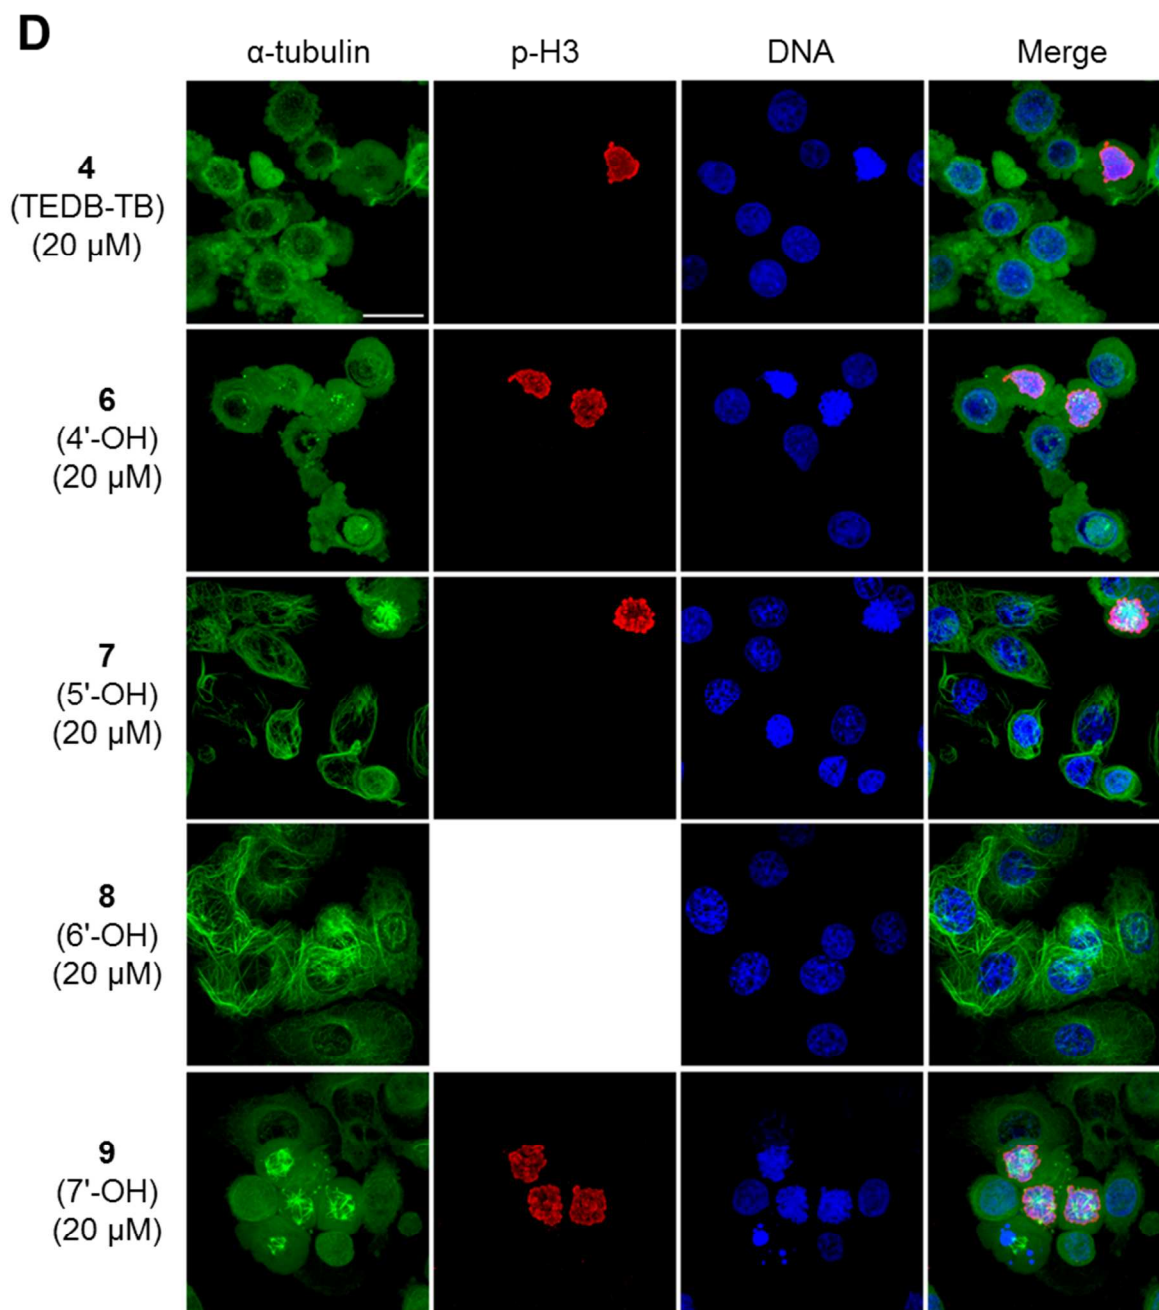

**Figure S2. Dose-dependent effects of compounds on microtubule morphology in PC-3 cells.** PC-3 cells were cultured and treated for 24 h with one of several concentrations of CA-4, PXL (A), or compounds **4**, **6**, **7**, **8** or **9** at 0.2 (B), 2 (C) or 20  $\mu$ M (D). Cells were triple labeled with mouse monoclonal antibody to  $\alpha$ -tubulin (green), rabbit polyclonal antibody to Ser10-phosphorylated histone H3 (p-H3) (red) as mitotic marker, and DAPI for DNA (blue). 10 to 20 confocal microscopic stacked images were reconstructed by ZEN software.

(A) Defects of microtubules following treatment with depolymerization agent CA-4 or microtubule stabilizing agent PXL. At the CA-4 concentration that inhibited microtubule polymerization, cells that were positive for accumulated p-H3 (Ser10) had no spindle formation, suggesting cell cycle arrest at prometaphase occurred in tandem with interphase microtubule depolymerization. Following treatment with 0.002  $\mu$ M CA-4, no of p-H3 positive cells were observed in the field, indicated by the absence of an image. Bar, 25  $\mu$ m.

(B-D) Dose dependent effects of **4** and its analogues on microtubule morphology in PC-3 cells. PC-3 cells were cultured and treated for 24 h with compound at 0.2 (B), 2 (C) or 20  $\mu$ M (D), followed by triple-labeling of  $\alpha$ -tubulin (green), p-H3 (red) and DNA (Blue). Confocal images were processed by ZEN software. No p-H3 (Ser10) positive cells were observed in the field with cells treated with 0.002  $\mu$ M CA-4 (indicated by an absent image in A) or 20  $\mu$ M compound **8** (indicated by an absent image in D). Bar, 25  $\mu$ m.

## 6. Figure S3.

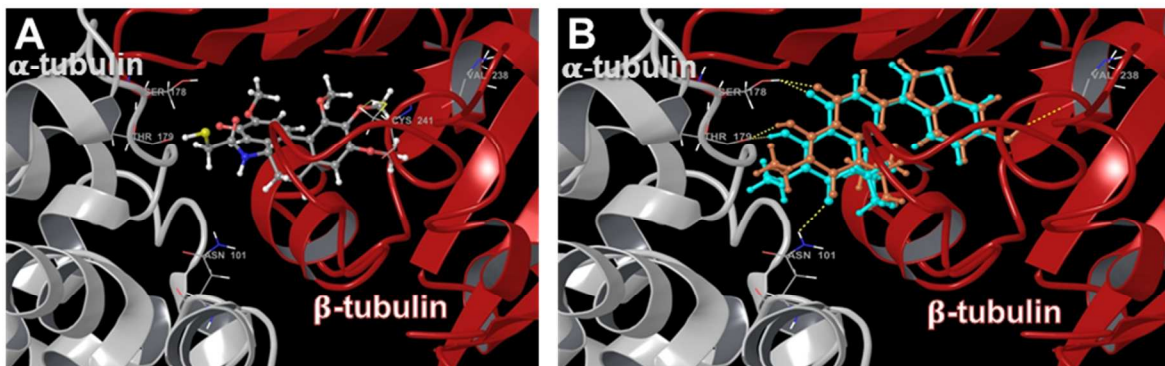

**Figure S3. Predicted docking modes for compounds binding to tubulin.**

(A) Detailed view of docking model of DAMA-colchicine in the tubulin crystal structure (PDB ID: 1SA0). Colchicine shows a H-bond-like interaction with the side chain of  $\beta$ Cys241. (B) H-bonds calculated to be less than 3 Å between the protein and compounds **4** (blue) and **8** (brown) are represented by dashed lines.

**7. Figure S4.**

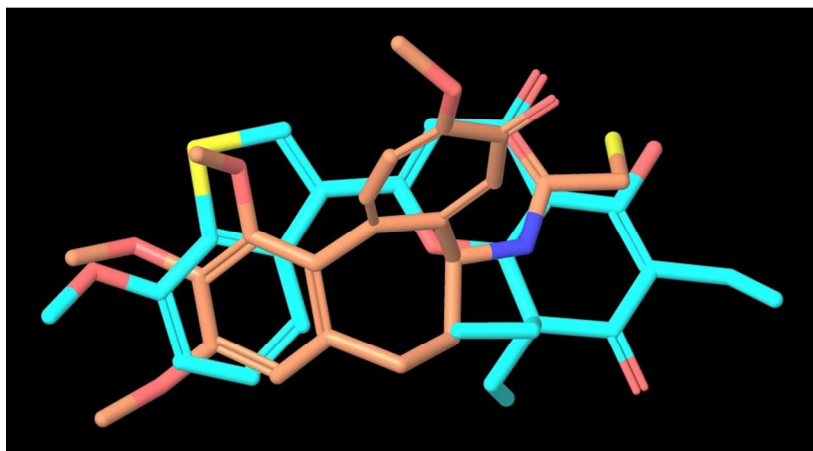

**Figure S3.** 3D models of **12** (blue skeleton) and DAMA-colchicine (brown skeleton) with oxygen in red, nitrogen in blue and sulfur in yellow.

## 8. References for Supporting Information

1. Plé, P.A.; Marnett, L.J, Synthesis of substituted benzo[*b*]thiophene by acid-catalyzed cyclization of thiophenylacetals and ketones. *J. Heterocyclic Chem.* **1988**, *25*, 1271-1272.
2. Matsunaga, N.; Kaku, T.; Itoh, F.; Tanaka, T.; Hara, T.; Miki, H.; Iwasaki, M.; Aono, T.; Yamaoka, M.; Kusaka, M.; Tasaka, A. C<sub>17,20</sub>-Lyase inhibitors I. Structure-based de novo design and SAR study of C<sub>17,20</sub>-lyase inhibitors. *Bioorg. Med. Chem.* **2004**, *12*, 2251-2273.
3. Campaigne, E.; Rpgers, R.B. Benzo[*b*]thiophene derivatives. XIX. Sulfur isosteres of psilocine and related isomers. *J. Heterocyclic Chem.* **1973**, *10*, 297-305.
4. Campaigne, E.; Dinner, A.; Neiss, E.S. Benzo[*b*]thiophene derivatives. XV. Preparation and electrophilic substitution of 6-methoxy-3-methylbenzo[*b*]thiophene. *J. Heterocyclic Chem.* **1970**, *70*, 695-670.
5. Buchwald, S.L.; Fang, Q. An efficient one-pot method for the preparation of polysubstituted benzothiophenes. *J. Org. Chem.* **1989**, *54*, 2793-2797.
6. Buchheit, K.-H.; Gamse, R.; Giger, R.; Hoyer, D.; Klein, F.; Kloppner, E.; Pfannkuche, H.; Mattes, H. The serotonin 5-HT<sub>4</sub> receptor. 2. Structure-activity studies of the indole carbazimidamide class of agonists. *J. Med. Chem.* **1995**, *38*, 2331-2338.
7. Lena, G.; Trapani, J.A.; Sutton, V.R.; Ciccone, A.; Browne, K.A.; Smyth, M.J.; Denny, W.A.; Spicer, J.A. Dihydrofuro[3,4-*c*]pyridinones as inhibitors of the cytolytic effects of the pore-forming glycoprotein perforin. *J. Med. Chem.* **2008**, *51*, 7614-7624.
